# Supplementary material for: “Pulsed Hypoxia” Gradually Reprograms Breast Cancer Fibroblasts into Pro-Tumorigenic Cells via Mesenchymal–Epithelial Transition
Source: MDPI journal article supplement (doi:10.3390/ijms24032494), 2023-01-27
Supplement: s1 [file s1]

Supplementary Materials:

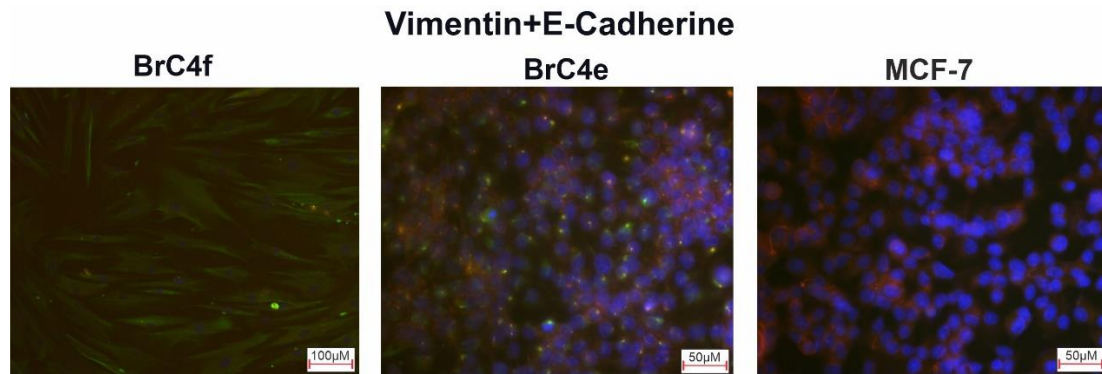

**Figure S1.** Detection of vimentin and E-cadherin after transformation of fibroblast cells to epithelial cells.

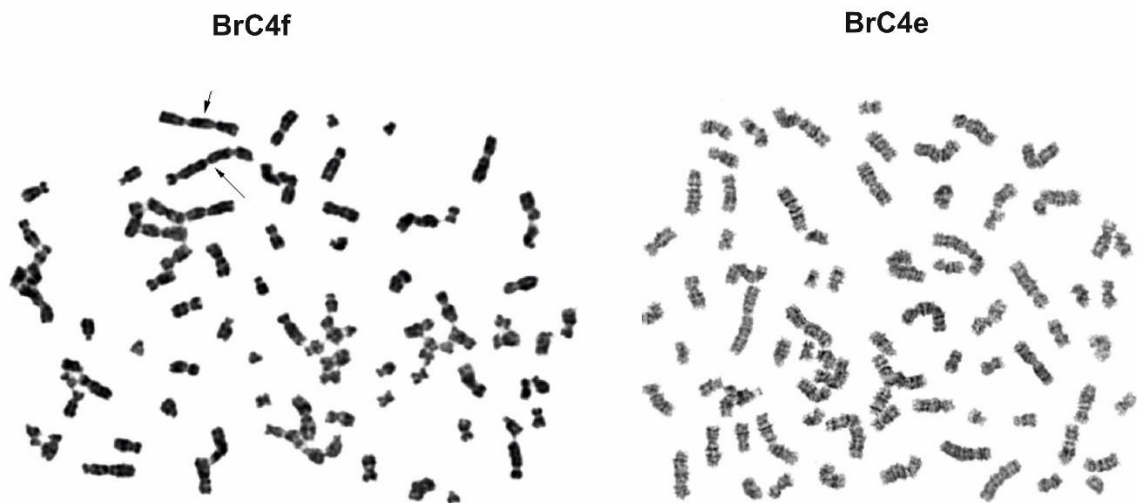

**Figure S2.** Karyotype analysis of GTG-stained chromosomes.

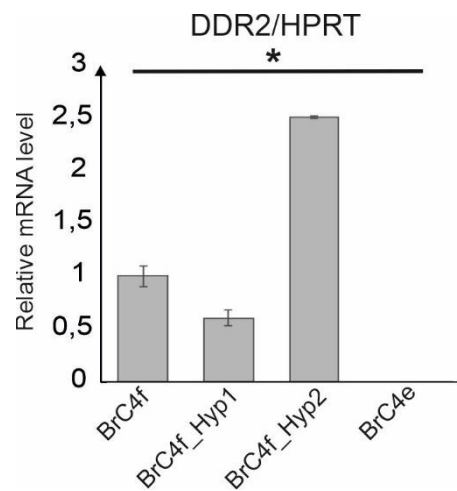

**Figure S3.** Alteration of mRNA expression level DDR2 gene by RT-PCR. The expression of specific mRNAs was normalized to the expression level of Hypoxanthine Phosphoribosyl transferase (HPRT) mRNA. Statistical analysis included the results of two independent experiments (mean  $\pm$  SD). \* The difference between the experimental group and the control (BrC4f) was statistically significant at  $p < 0.05$ .

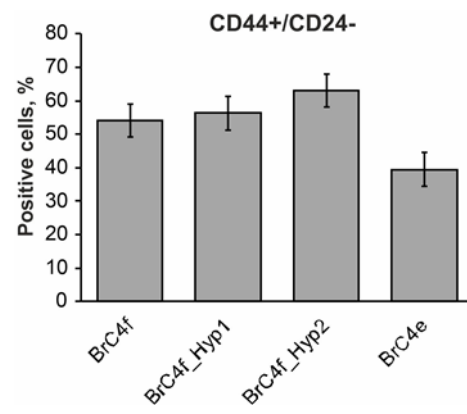

**Figure S4.** CD44<sup>+</sup>/CD24<sup>-</sup> population in the established cell lines. Data of flow cytofluorometry analysis of immunostained cells.
